# Supplementary material
Source: HighWire-hosted journal article supplement (http://ip.bmjjournals.com/highwire/filestream/145800/field_highwire_adjunct_files/0/133215webonlyapp1.pdf)

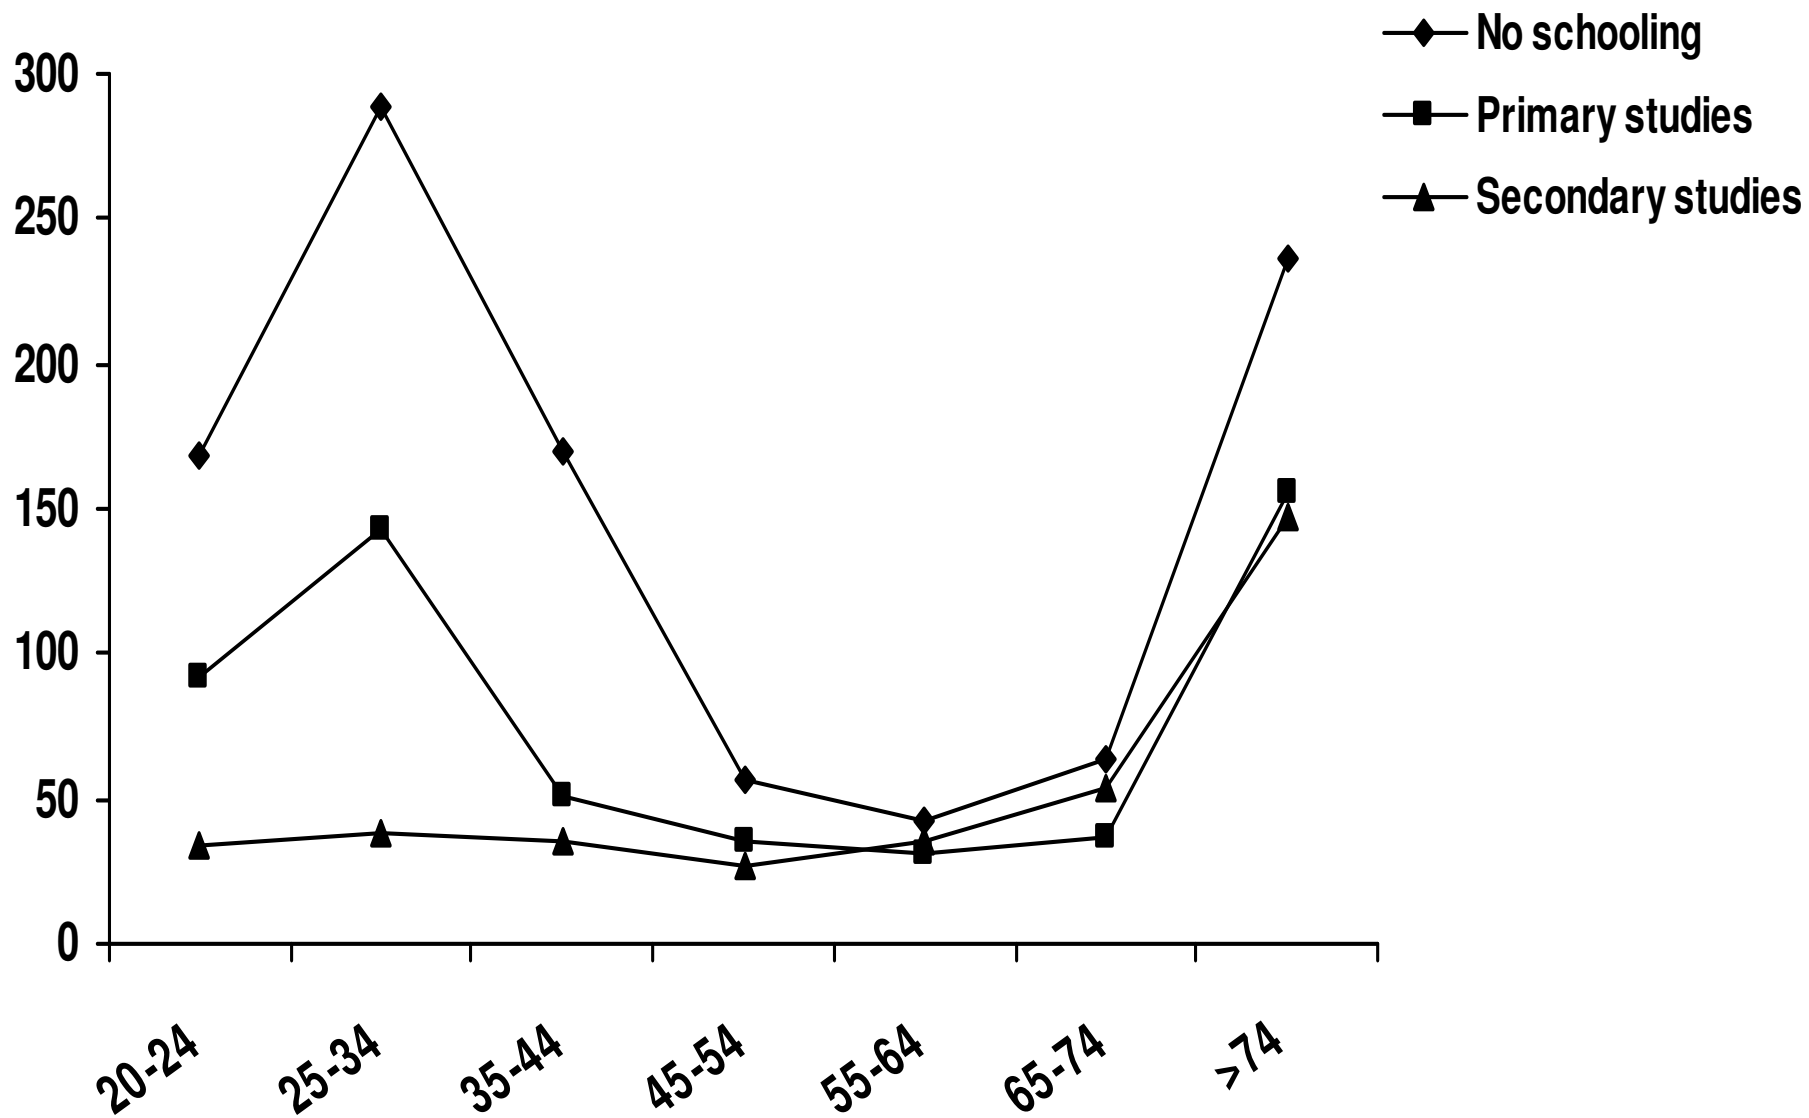

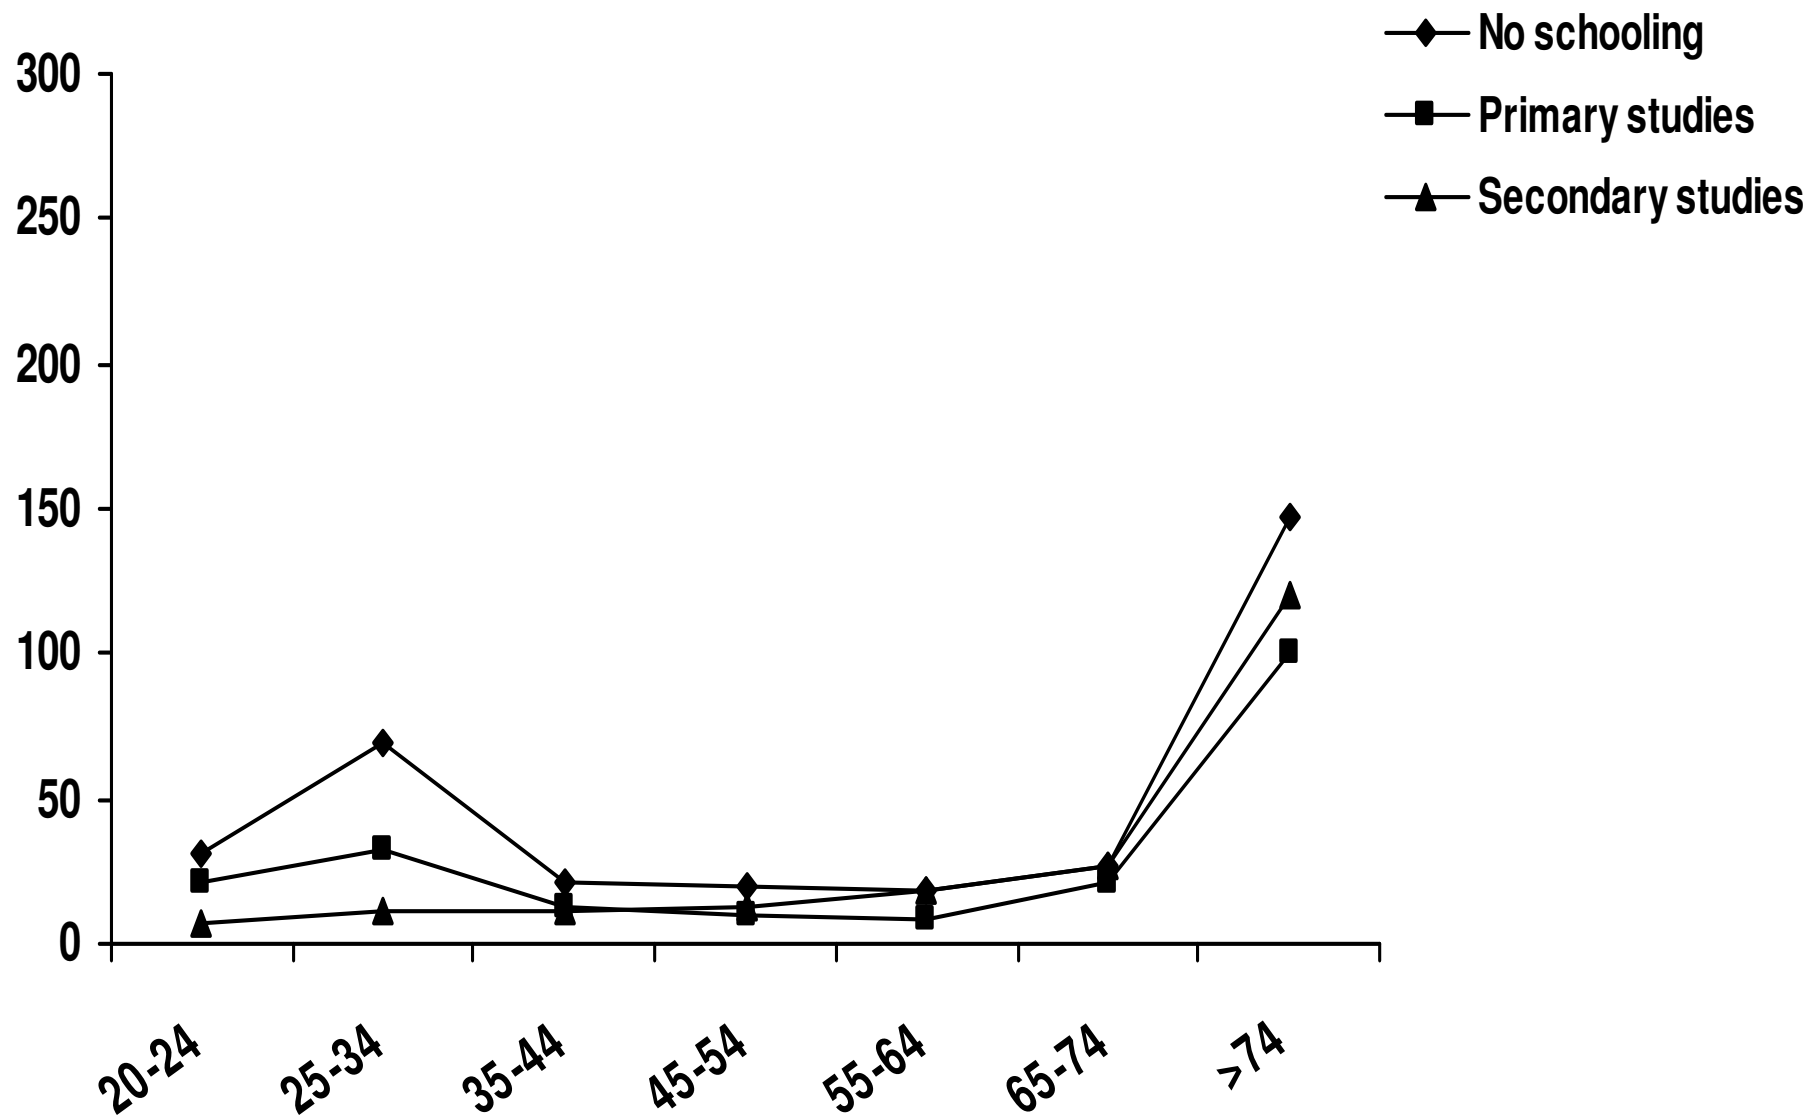

Supplement: 133215webonlyapp1.pdf [file 133215webonlyapp1.pdf]
